# Supplementary material
Source: Springer Nature journal article supplement (https://www.springermedizin.de/resource/supplementary/12960_2006_60_MOESM3_ESM.pdf/9570326)
Supplement: MOESM3 [file 9570326]

# Average Annual Premiums for Employer-Sponsored Family Health Coverage

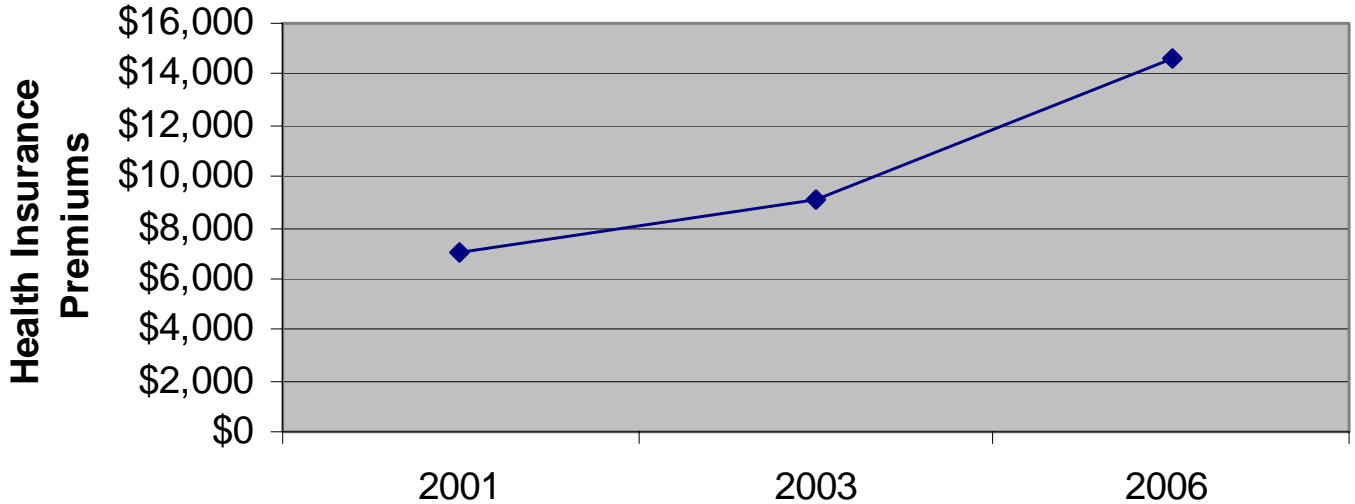

Source: National Coalition on Health Care, 2004
